# Supplementary material for: An Ancient Translation : Lexical and cultural aspects in a text about the Lullingstone Roman Villa
Source: MDPI journal article supplement (doi:10.3390/jcm10184187), 2011-01-01
Supplement: s1 [file s1]

**Table S1. List of the NGS-based pre-S genotyping result in 75 HBV-related HCC patients**

| <b>Patient No.</b> | <b>Pre-S Del Type (%)<sup>a</sup></b>                                                                                             | <b>Pre-S Del Region (%)<sup>c</sup></b>                                                                                                                     | <b>Del Spanning Pre-S2 Gene Segment<sup>d</sup></b> |
|--------------------|-----------------------------------------------------------------------------------------------------------------------------------|-------------------------------------------------------------------------------------------------------------------------------------------------------------|-----------------------------------------------------|
| 1                  | 1. <b>pre-S1 del (92.118)<sup>b</sup></b><br>2. <b>wild-type (7.278)</b><br>3. pre-S2 del (0.372)<br>4. pre-S1+pre-S2 del (0.231) | 1. pre-S1 del (nt 2855-2872) (90.102)<br>2. wild-type (7.278)<br>3. pre-S2 del (nt 1-28) (0.180)<br>4. pre-S1+pre-S2 del (nt 2855-2872, 1-111) (0.027)      | absence                                             |
| 2                  | 1. <b>pre-S1 del (75.241)</b><br>2. <b>wild-type (22.338)</b><br>3. pre-S2 del (1.891)<br>4. pre-S1+pre-S2 del (0.530)            | 1. pre-S1 del (nt 2910-3089) (48.977)<br>2. wild-type (22.338)<br>3. pre-S2 del (nt 1-54) (1.579)<br>4. pre-S1+pre-S2 del (nt 2910-3089, 1-57) (0.277)      | absence                                             |
| 3                  | 1. <b>pre-S1 del (76.228)</b><br>2. <b>wild-type (12.583)</b><br>3. <b>pre-S2 del (10.622)</b><br>4. pre-S1+pre-S2 del (0.567)    | 1. pre-S1 del (nt 3110-3127) (24.869)<br>2. wild-type (12.583)<br>3. pre-S2 del (nt 1-57) (10.000)<br>4. pre-S1+pre-S2 del (nt 2855-2872, 1-57) (0.490)     | presence                                            |
| 4                  | 1. <b>wild-type (71.590)</b><br>2. <b>pre-S1 del (28.270)</b><br>3. pre-S2 del (0.129)<br>4. pre-S1+pre-S2 del (0.011)            | 1. wild-type (71.590)<br>2. pre-S1 del (nt 2854-3147) (23.961)<br>3. pre-S2 del (nt 3211-3216) (0.048)<br>4. pre-S1+pre-S2 del (nt 2954-3097, 1-54) (0.002) | absence                                             |
| 5                  | 1. <b>wild-type (58.461)</b><br>2. <b>pre-S2 del (37.194)</b><br>3. pre-S1 del (2.939)<br>4. pre-S1+pre-S2 del (1.407)            | 1. wild-type (58.461)<br>2. pre-S2 del (nt 24-50) (33.801)<br>3. pre-S1 del (nt 2880-3146) (0.646)<br>4. pre-S1+pre-S2 del (nt 2880-3146, 24-50) (0.355)    | presence                                            |
| 6                  | 1. <b>wild-type (96.592)</b><br>2. pre-S1 del (2.906)<br>3. pre-S2 del (0.469)<br>4. pre-S1+pre-S2 del (0.033)                    | 1. wild-type (96.592)<br>2. pre-S1 del (nt 3026-3205) (0.604)<br>3. pre-S2 del (nt 1-12) (0.233)<br>4. pre-S1+pre-S2 del (nt 2854-2979, 6-134) (0.008)      | absence                                             |

**Table S1. List of the NGS-based pre-S genotyping result in 75 HBV-related HCC patients (continued)**

| <b>Patient No.</b> | <b>Pre-S Del Type (%)<sup>a</sup></b> | <b>Pre-S Del Region (%)<sup>c</sup></b>             | <b>Del Spanning Pre-S2 Gene Segment<sup>d</sup></b> |
|--------------------|---------------------------------------|-----------------------------------------------------|-----------------------------------------------------|
| 7                  | 1. <b>wild-type (99.000)</b>          | 1. wild-type (99.000)                               | absence                                             |
|                    | 2. pre-S1 del (0.927)                 | 2. pre-S1 del (nt 3106-3129) (0.294)                |                                                     |
|                    | 3. pre-S2 del (0.062)                 | 3. pre-S2 del (nt 1-54) (0.031)                     |                                                     |
|                    | 4. pre-S1+pre-S2 del (0.012)          | 4. pre-S1+pre-S2 del (nt 2855-2972, 1-54) (0.008)   |                                                     |
| 8                  | 1. <b>wild-type (93.746)</b>          | 1. wild-type (93.746)                               | absence                                             |
|                    | 2. <b>pre-S1 del (5.846)</b>          | 2. pre-S1 del (nt 3026-3205) (2.417)                |                                                     |
|                    | 3. pre-S2 del (0.389)                 | 3. pre-S2 del (nt 3211-3213) (0.135)                |                                                     |
|                    | 4. pre-S1+pre-S2 del (0.018)          | 4. pre-S1+pre-S2 del (nt 2856-2873, 1-21) (0.004)   |                                                     |
| 9                  | 1. <b>pre-S1+pre-S2 del (46.237)</b>  | 1. pre-S1+pre-S2 del (nt 2956-3126, 1-9) (24.002)   | presence                                            |
|                    | 2. <b>pre-S2 del (26.927)</b>         | 2. pre-S2 del (nt 1-54) (23.226)                    |                                                     |
|                    | 3. <b>pre-S1 del (14.368)</b>         | 3. pre-S1 del (nt 2944-3075) (5.140)                |                                                     |
|                    | 4. <b>wild-type (12.467)</b>          | 4. wild-type (12.467)                               |                                                     |
| 10                 | 1. <b>wild-type (97.851)</b>          | 1. wild-type (97.851)                               | absence                                             |
|                    | 2. pre-S1 del (2.037)                 | 2. pre-S1 del (nt 3026-3205) (1.109)                |                                                     |
|                    | 3. pre-S2 del (0.108)                 | 3. pre-S2 del (nt 3211-3213) (0.049)                |                                                     |
|                    | 4. pre-S1+pre-S2 del (0.005)          | 4. pre-S1+pre-S2 del (nt 2855-2872, 1-54) (0.003)   |                                                     |
| 11                 | 1. <b>wild-type (98.964)</b>          | 1. wild-type (98.964)                               | absence                                             |
|                    | 2. pre-S1 del (0.943)                 | 2. pre-S1 del (nt 2854-2970) (0.125)                |                                                     |
|                    | 3. pre-S2 del (0.084)                 | 3. pre-S2 del (nt 1-9) (0.028)                      |                                                     |
|                    | 4. pre-S1+pre-S2 del (0.009)          | 4. pre-S1+pre-S2 del (nt 2954-3097, 1-13) (0.009)   |                                                     |
| 12                 | 1. <b>wild-type (97.781)</b>          | 1. wild-type (97.781)                               | absence                                             |
|                    | 2. pre-S1 del (2.099)                 | 2. pre-S1 del (nt 3026-3205) (1.099)                |                                                     |
|                    | 3. pre-S2 del (0.112)                 | 3. pre-S2 del (nt 3211-3216) (0.055)                |                                                     |
|                    | 4. pre-S1+pre-S2 del (0.008)          | 4. pre-S1+pre-S2 del (nt 3026-3205, 43-138) (0.002) |                                                     |

**Table S1. List of the NGS-based pre-S genotyping result in 75 HBV-related HCC patients (continued)**

| <b>Patient No.</b> | <b>Pre-S Del Type (%)<sup>a</sup></b>                                                                                                  | <b>Pre-S Del Region (%)<sup>c</sup></b>                                                                                                                                      | <b>Del Spanning Pre-S2 Gene Segment<sup>d</sup></b> |
|--------------------|----------------------------------------------------------------------------------------------------------------------------------------|------------------------------------------------------------------------------------------------------------------------------------------------------------------------------|-----------------------------------------------------|
| 13                 | 1. <b>wild-type (92.291)</b><br>2. pre-S1 del (4.092)<br>3. pre-S2 del (3.038)<br>4. pre-S1+pre-S2 del (0.578)                         | 1. wild-type (92.291)<br>2. pre-S1 del (nt 2854-2970) (0.650)<br>3. pre-S2 del (nt 1-54) (2.641)<br>4. pre-S1+pre-S2 del (nt 2855-2872, 1-54) (0.435)                        | absence                                             |
| 14                 | 1. <b>wild-type (69.001)</b><br>2. <b>pre-S1 del (20.530)</b><br>3. <b>pre-S2 del (9.463)</b><br>4. pre-S1+pre-S2 del (1.006)          | 1. wild-type (69.001)<br>2. pre-S1 del (nt 3110-3127) (4.779)<br>3. pre-S2 del (nt 1-54) (8.226)<br>4. pre-S1+pre-S2 del (nt 2855-2872, 1-18, 26-59) (0.259)                 | presence                                            |
| 15                 | 1. <b>wild-type (50.938)</b><br>2. <b>pre-S1 del (19.760)</b><br>3. <b>pre-S1+pre-S2 del (15.021)</b><br>4. <b>pre-S2 del (14.280)</b> | 1. wild-type (50.938)<br>2. pre-S1 del (nt 2854-2970) (5.470)<br>3. pre-S1+pre-S2 del (nt 2855-2872, 1-54) (12.421)<br>4. pre-S2 del (nt 1-54) (13.606)                      | presence                                            |
| 16                 | 1. <b>wild-type (75.230)</b><br>2. <b>pre-S1+pre-S2 del (13.878)</b><br>3. <b>pre-S1 del (10.730)</b><br>4. pre-S2 del (0.162)         | 1. wild-type (75.230)<br>2. pre-S1+pre-S2 del (nt 2860-2880, 2954-3097, 1-15) (11.572)<br>3. pre-S1 del (nt 2860-2880, 2954-3097) (9.550)<br>4. pre-S2 del (nt 1-15) (0.138) | presence                                            |
| 17                 | 1. <b>wild-type (98.571)</b><br>2. pre-S1 del (1.173)<br>3. pre-S2 del (0.178)<br>4. pre-S1+pre-S2 del (0.078)                         | 1. wild-type (98.571)<br>2. pre-S1 del (nt 3106-3129) (0.242)<br>3. pre-S2 del (nt 2-149) (0.043)<br>4. pre-S1+pre-S2 del (nt 2854-2985, 27-149) (0.014)                     | absence                                             |
| 18                 | 1. <b>wild-type (96.915)</b><br>2. pre-S1 del (2.701)<br>3. pre-S2 del (0.364)<br>4. pre-S1+pre-S2 del (0.020)                         | 1. wild-type (96.915)<br>2. pre-S1 del (nt 3026-3205) (1.755)<br>3. pre-S2 del (nt 25-54) (0.148)<br>4. pre-S1+pre-S2 del (nt 2854-2988, 45-149) (0.004)                     | absence                                             |

**Table S1. List of the NGS-based pre-S genotyping result in 75 HBV-related HCC patients (continued)**

| <b>Patient No.</b> | <b>Pre-S Del Type (%)<sup>a</sup></b>                                                                                                  | <b>Pre-S Del Region (%)<sup>c</sup></b>                                                                                                                 | <b>Del Spanning Pre-S2 Gene Segment<sup>d</sup></b> |
|--------------------|----------------------------------------------------------------------------------------------------------------------------------------|---------------------------------------------------------------------------------------------------------------------------------------------------------|-----------------------------------------------------|
| 19                 | 1. <b>wild-type (98.069)</b><br>2. pre-S1 del (1.263)<br>3. pre-S2 del (0.609)<br>4. pre-S1+pre-S2 del (0.059)                         | 1. wild-type (98.069)<br>2. pre-S1 del (nt 3103-3126) (0.253)<br>3. pre-S2 del (nt 1-15) (0.535)<br>4. pre-S1+pre-S2 del (nt 2854-2996, 44-144) (0.015) | absence                                             |
| 20                 | 1. <b>wild-type (69.571)</b><br>2. <b>pre-S2 del (18.590)</b><br>3. <b>pre-S1+pre-S2 del (8.224)</b><br>4. pre-S1 del (3.615)          | 1. wild-type (69.571)<br>2. pre-S2 del (nt 1-54) (18.482)<br>3. pre-S1+pre-S2 del (nt 2855-2872, 1-54) (7.712)<br>4. pre-S1 del (nt 2855-2872) (2.674)  | presence                                            |
| 21                 | 1. <b>pre-S2 del (41.477)</b><br>2. <b>pre-S1+pre-S2 del (39.126)</b><br>3. <b>wild-type (12.348)</b><br>4. <b>pre-S1 del (7.048)</b>  | 1. pre-S2 del (nt 1-54) (24.620)<br>2. pre-S1+pre-S2 del (nt 2855-2872, 1-54) (26.451)<br>3. wild-type (12.348)<br>4. pre-S1 del (nt 2855-2872) (4.978) | presence                                            |
| 22                 | 1. <b>pre-S2 del (42.909)</b><br>2. <b>pre-S1+pre-S2 del (27.915)</b><br>3. <b>wild-type (17.564)</b><br>4. <b>pre-S1 del (11.612)</b> | 1. pre-S2 del (nt 1-54) (38.091)<br>2. pre-S1+pre-S2 del (2855-2872, 1-54) (25.090)<br>3. wild-type (17.564)<br>4. pre-S1 del (nt 2855-2872) (8.072)    | presence                                            |
| 23                 | 1. <b>wild-type (52.661)</b><br>2. <b>pre-S2 del (25.093)</b><br>3. <b>pre-S1+pre-S2 del (11.424)</b><br>4. <b>pre-S1 del (10.821)</b> | 1. wild-type (52.661)<br>2. pre-S2 del (nt 1-54) (18.682)<br>3. pre-S1+pre-S2 del (nt 2855-2872, 1-54) (8.344)<br>4. pre-S1 del (nt 2855-2872) (2.817)  | presence                                            |
| 24                 | 1. <b>wild-type (96.073)</b><br>2. pre-S1 del (1.895)<br>3. pre-S1+pre-S2 del (1.202)<br>4. pre-S2 del (0.830)                         | 1. wild-type (96.073)<br>2. pre-S1 del (nt 2954-3097) (0.632)<br>3. pre-S1+pre-S2 del (nt 2855-2872, 1-54) (0.452)<br>4. pre-S2 del (nt 1-54) (0.382)   | absence                                             |

**Table S1. List of the NGS-based pre-S genotyping result in 75 HBV-related HCC patients (continued)**

| <b>Patient No.</b> | <b>Pre-S Del Type (%)<sup>a</sup></b> | <b>Pre-S Del Region (%)<sup>c</sup></b>                      | <b>Del Spanning Pre-S2 Gene Segment<sup>d</sup></b> |
|--------------------|---------------------------------------|--------------------------------------------------------------|-----------------------------------------------------|
| 25                 | 1. <b>wild-type (93.547)</b>          | 1. wild-type (93.547)                                        | absence                                             |
|                    | 2. pre-S1 del (4.345)                 | 2. pre-S1 del (nt 3026-3205) (0.869)                         |                                                     |
|                    | 3. pre-S2 del (1.844)                 | 3. pre-S2 del (nt 1-54) (1.107)                              |                                                     |
|                    | 4. pre-S1+pre-S2 del (0.265)          | 4. pre-S1+pre-S2 del (nt 2855-2872, 2897-2923, 1-54) (0.180) |                                                     |
| 26                 | 1. <b>wild-type (97.921)</b>          | 1. wild-type (97.921)                                        | absence                                             |
|                    | 2. pre-S1 del (1.388)                 | 2. pre-S1 del (nt 3067-3162) (0.040)                         |                                                     |
|                    | 3. pre-S2 del (0.691)                 | 3. pre-S2 del (nt 3211-3216) (0.046)                         |                                                     |
|                    | 4. pre-S1+pre-S2 del (0.000)          | 4. pre-S1+pre-S2 del (0.000)                                 |                                                     |
| 27                 | 1. <b>wild-type (60.195)</b>          | 1. wild-type (60.195)                                        | presence                                            |
|                    | 2. <b>pre-S2 del (22.882)</b>         | 2. pre-S2 del (nt 1-57) (22.473)                             |                                                     |
|                    | 3. <b>pre-S1+pre-S2 del (9.280)</b>   | 3. pre-S1+pre-S2 del (nt 2855-2872, 1-54) (4.815)            |                                                     |
|                    | 4. <b>pre-S1 del (7.643)</b>          | 4. pre-S1 del (nt 3025-3126) (4.396)                         |                                                     |
| 28                 | 1. <b>pre-S1 del (75.113)</b>         | 1. pre-S1 del (nt 2855-2872) (5.979)                         | presence                                            |
|                    | 2. <b>wild-type (11.506)</b>          | 2. wild-type (11.506)                                        |                                                     |
|                    | 3. <b>pre-S1+pre-S2 del (10.472)</b>  | 3. pre-S1+pre-S2 del (nt 2855-2872, 1-54) (8.016)            |                                                     |
|                    | 4. pre-S2 del (2.909)                 | 4. pre-S2 del (nt 1-54) (2.747)                              |                                                     |
| 29                 | 1. <b>wild-type (97.730)</b>          | 1. wild-type (97.730)                                        | absence                                             |
|                    | 2. pre-S1 del (1.691)                 | 2. pre-S1 del (nt 2855-2970) (0.217)                         |                                                     |
|                    | 3. pre-S2 del (0.575)                 | 3. pre-S2 del (nt 1-12) (0.323)                              |                                                     |
|                    | 4. pre-S1+pre-S2 del (0.004)          | 4. pre-S1+pre-S2 del (nt 2855-2970, 1-54) (0.004)            |                                                     |
| 30                 | 1. <b>wild-type (87.018)</b>          | 1. wild-type (87.018)                                        | absence                                             |
|                    | 2. <b>pre-S1 del (11.703)</b>         | 2. pre-S1 del (nt 3010-3075) (5.189)                         |                                                     |
|                    | 3. pre-S2 del (1.113)                 | 3. pre-S2 del (nt 1-9) (0.392)                               |                                                     |
|                    | 4. pre-S1+pre-S2 del (0.166)          | 4. pre-S1+pre-S2 del (nt 3010-3075, 1-9) (0.046)             |                                                     |

**Table S1. List of the NGS-based pre-S genotyping result in 75 HBV-related HCC patients (continued)**

| <b>Patient No.</b> | <b>Pre-S Del Type (%)<sup>a</sup></b> | <b>Pre-S Del Region (%)<sup>c</sup></b>                      | <b>Del Spanning Pre-S2 Gene Segment<sup>d</sup></b> |
|--------------------|---------------------------------------|--------------------------------------------------------------|-----------------------------------------------------|
| 31                 | 1. <b>wild-type (78.709)</b>          | 1. wild-type (78.709)                                        | absence                                             |
|                    | 2. <b>pre-S1 deletion (20.616)</b>    | 2. pre-S1 del (nt 2910-3089) (9.181)                         |                                                     |
|                    | 3. pre-S2 del (0.646)                 | 3. pre-S2 del (nt 1-15) (0.345)                              |                                                     |
|                    | 4. pre-S1+pre-S2 del (0.029)          | 4. pre-S1+pre-S2 del (nt 2910-3055, 3067-3089, 4-12) (0.007) |                                                     |
| 32                 | 1. <b>wild-type (98.105)</b>          | 1. wild-type (98.105)                                        | absence                                             |
|                    | 2. pre-S1 del (1.152)                 | 2. pre-S1 del (nt 2855-2970) (0.060)                         |                                                     |
|                    | 3. pre-S2 del (0.733)                 | 3. pre-S2 del (nt 1-9) (0.408)                               |                                                     |
|                    | 4. pre-S1+pre-S2 del (0.010)          | 4. pre-S1+pre-S2 del (nt 2855-2872, 1-54) (0.003)            |                                                     |
| 33                 | 1. <b>wild-type (80.067)</b>          | 1. wild-type (80.067)                                        | presence                                            |
|                    | 2. <b>pre-S2 del (9.477)</b>          | 2. pre-S2 del (nt 1-12) (8.957)                              |                                                     |
|                    | 3. <b>pre-S1 del (8.993)</b>          | 3. pre-S1 del (nt 2866-3075) (7.322)                         |                                                     |
|                    | 4. pre-S1+pre-S2 del (1.463)          | 4. pre-S1+pre-S2 del (nt 2866-3075, 1-9) (0.871)             |                                                     |
| 34                 | 1. <b>wild-type (80.175)</b>          | 1. wild-type (80.175)                                        | presence                                            |
|                    | 2. <b>pre-S2 del (13.639)</b>         | 2. pre-S2 del (nt 1-30) (4.394)                              |                                                     |
|                    | 3. <b>pre-S1 del (5.169)</b>          | 3. pre-S1 del (nt 2865-2975) (2.356)                         |                                                     |
|                    | 4. pre-S1+pre-S2 del (1.017)          | 4. pre-S1+pre-S2 del (nt 2866-2975, 1-29) (0.212)            |                                                     |
| 35                 | 1. <b>wild-type (92.156)</b>          | 1. wild-type (92.156)                                        | absence                                             |
|                    | 2. <b>pre-S1 del (7.022)</b>          | 2. pre-S1 del (nt 2854-3018) (1.346)                         |                                                     |
|                    | 3. pre-S2 del (0.793)                 | 3. pre-S2 del (nt 1-9) (0.323)                               |                                                     |
|                    | 4. pre-S1+pre-S2 del (0.029)          | 4. pre-S1+pre-S2 del (nt 2855-2872, 1-9) (0.004)             |                                                     |
| 36                 | 1. <b>pre-S1+pre-S2 del (40.433)</b>  | 1. pre-S1+pre-S2 del (nt 2855-2872, 1-54) (22.713)           | presence                                            |
|                    | 2. <b>pre-S1 del (34.174)</b>         | 2. pre-S1 del (nt 2854-2970) (22.956)                        |                                                     |
|                    | 3. <b>wild-type (20.822)</b>          | 3. wild-type (20.822)                                        |                                                     |
|                    | 4. pre-S2 del (4.571)                 | 4. pre-S2 del (nt 1-54) (4.380)                              |                                                     |

**Table S1. List of the NGS-based pre-S genotyping result in 75 HBV-related HCC patients (continued)**

| <b>Patient No.</b> | <b>Pre-S Del Type (%)<sup>a</sup></b>                                                                                         | <b>Pre-S Del Region (%)<sup>c</sup></b>                                                                                                                           | <b>Del Spanning Pre-S2 Gene Segment<sup>d</sup></b> |
|--------------------|-------------------------------------------------------------------------------------------------------------------------------|-------------------------------------------------------------------------------------------------------------------------------------------------------------------|-----------------------------------------------------|
| 37                 | 1. <b>wild-type (80.758)</b><br>2. <b>pre-S2 del (12.910)</b><br>3. <b>pre-S1 del (5.629)</b><br>4. pre-S1+pre-S2 del (0.704) | 1. wild-type (80.758)<br>2. pre-S2 del (nt 1-54) (6.944)<br>3. pre-S1 del (nt 2855-2875) (4.209)<br>4. pre-S1+pre-S2 del (nt 2855-2875, 1-54) (0.253)             | presence                                            |
| 38                 | 1. <b>wild-type (61.320)</b><br>2. <b>pre-S1 del (34.045)</b><br>3. pre-S2 del (3.491)<br>4. pre-S1+pre-S2 del (1.144)        | 1. wild-type (61.320)<br>2. pre-S1 del (nt 3021-3203) (23.818)<br>3. pre-S2 del (nt 6-41) (1.385)<br>4. pre-S1+pre-S2 del (nt 2855-2872, 2919-3126, 6-41) (0.163) | absence                                             |
| 39                 | 1. <b>wild-type (97.172)</b><br>2. pre-S1 del (1.957)<br>3. pre-S2 del (0.850)<br>4. pre-S1+pre-S2 del (0.021)                | 1. wild-type (97.172)<br>2. pre-S1 del (nt 3021-3203) (0.353)<br>3. pre-S2 del (nt 1-12) (0.488)<br>4. pre-S1+pre-S2 del (nt 3078-3094, 6-41) (0.003)             | absence                                             |
| 40                 | 1. <b>wild-type (97.501)</b><br>2. pre-S1 del (1.586)<br>3. pre-S2 del (0.908)<br>4. pre-S1+pre-S2 del (0.005)                | 1. wild-type (97.501)<br>2. pre-S1 del (nt 3107-3202) (0.081)<br>3. pre-S2 del (nt 1-12) (0.529)<br>4. pre-S1+pre-S2 del (nt 3133-3136, 1-10) (0.005)             | absence                                             |
| 41                 | 1. <b>pre-S1 del (84.262)</b><br>2. <b>wild-type (14.798)</b><br>3. pre-S1+pre-S2 del (0.779)<br>4. pre-S2 del (0.161)        | 1. pre-S1 del (nt 2858-2986) (82.700)<br>2. wild-type (14.798)<br>3. pre-S1+pre-S2 del (nt 2858-2981, 1-10) (0.268)<br>4. pre-S2 del (nt 1-33) (0.053)            | absence                                             |
| 42                 | 1. <b>wild-type (97.757)</b><br>2. pre-S1 del (1.305)<br>3. pre-S2 del (0.923)<br>4. pre-S1+pre-S2 del (0.015)                | 1. wild-type (97.757)<br>2. pre-S1 del (nt 3106-3207) (0.060)<br>3. pre-S2 del (nt 3211-3213) (0.124)<br>4. pre-S1+pre-S2 del (nt 3069-3118, 3211-3212) (0.004)   | absence                                             |

**Table S1. List of the NGS-based pre-S genotyping result in 75 HBV-related HCC patients (continued)**

| <b>Patient No.</b> | <b>Pre-S Del Type (%)<sup>a</sup></b>                                                                                                 | <b>Pre-S Del Region (%)<sup>c</sup></b>                                                                                                                      | <b>Del Spanning Pre-S2 Gene Segment<sup>d</sup></b> |
|--------------------|---------------------------------------------------------------------------------------------------------------------------------------|--------------------------------------------------------------------------------------------------------------------------------------------------------------|-----------------------------------------------------|
| 43                 | 1. <b>pre-S2 del (49.695)</b><br>2. <b>wild-type (49.248)</b><br>3. pre-S1+pre-S2 del (0.814)<br>4. pre-S1 del (0.242)                | 1. pre-S2 del (nt 37-54) (43.929)<br>2. wild-type (49.248)<br>3. pre-S1+pre-S2 del (nt 3139-3142, 37-54) (0.049)<br>4. pre-S1 del (nt 3103-3200) (0.019)     | presence                                            |
| 44                 | 1. <b>wild-type (98.244)</b><br>2. pre-S1 del (1.113)<br>3. pre-S2 del (0.643)<br>4. pre-S1+pre-S2 del (0.000)                        | 1. wild-type (98.244)<br>2. pre-S1 del (nt 3089-3202) (0.049)<br>3. pre-S2 del (nt 1-15) (0.319)<br>4. pre-S1+pre-S2 del (0.000)                             | absence                                             |
| 45                 | 1. <b>wild-type (97.534)</b><br>2. pre-S1 del (1.376)<br>3. pre-S2 del (1.076)<br>4. pre-S1+pre-S2 del (0.014)                        | 1. wild-type (97.534)<br>2. pre-S1 del (nt 3106-3207) (0.063)<br>3. pre-S2 del (nt 1-9) (0.769)<br>4. pre-S1+pre-S2 del (nt 3095-3150, 1-12) (0.007)         | absence                                             |
| 46                 | 1. <b>wild-type (97.735)</b><br>2. pre-S1 del (1.534)<br>3. pre-S2 del (0.731)<br>4. pre-S1+pre-S2 del (0.000)                        | 1. wild-type (97.735)<br>2. pre-S1 del (nt 3138-3197) (0.111)<br>3. pre-S2 del (nt 1-9) (0.371)<br>4. pre-S1+pre-S2 del (0.000)                              | absence                                             |
| 47                 | 1. <b>wild-type (78.334)</b><br>2. <b>pre-S1 del (20.695)</b><br>3. pre-S2 del (0.866)<br>4. pre-S1+pre-S2 del (0.105)                | 1. wild-type (78.334)<br>2. pre-S1 del (nt 2895-3140) (15.887)<br>3. pre-S2 del (nt 1-9) (0.279)<br>4. pre-S1+pre-S2 del (nt 2895-3141, 1-19, 23-27) (0.023) | absence                                             |
| 48                 | 1. <b>pre-S1 del (57.159)</b><br>2. <b>wild-type (20.456)</b><br>3. <b>pre-S2 del (13.666)</b><br>4. <b>pre-S1+pre-S2 del (8.719)</b> | 1. pre-S1 del (nt 2968-3093) (47.067)<br>2. wild-type (20.456)<br>3. pre-S2 del (nt 1-54) (8.120)<br>4. pre-S1+pre-S2 del (nt 2968-3093, 1-54) (3.469)       | presence                                            |



**Table S1. List of the NGS-based pre-S genotyping result in 75 HBV-related HCC patients (continued)**

| <b>Patient No.</b> | <b>Pre-S Del Type (%)<sup>a</sup></b>                                                                                  | <b>Pre-S Del Region (%)<sup>c</sup></b>                                                                                                               | <b>Del Spanning Pre-S2 Gene Segment<sup>d</sup></b> |
|--------------------|------------------------------------------------------------------------------------------------------------------------|-------------------------------------------------------------------------------------------------------------------------------------------------------|-----------------------------------------------------|
| 49                 | 1. <b>wild-type (75.021)</b><br>2. <b>pre-S2 del (21.983)</b><br>3. pre-S1 del (2.327)<br>4. pre-S1+pre-S2 del (0.669) | 1. wild-type (75.021)<br>2. pre-S2 del (nt 1-1) (19.454)<br>3. pre-S1 del (nt 2855-2872) (0.704)<br>4. pre-S1+pre-S2 del (nt 2855-2872, 1-54) (0.606) | presence                                            |
| 50                 | 1. <b>wild-type (98.169)</b><br>2. pre-S1 del (1.138)<br>3. pre-S2 del (0.693)<br>4. pre-S1+pre-S2 del (0.000)         | 1. wild-type (98.169)<br>2. pre-S1 del (nt 3138-3197) (0.067)<br>3. pre-S2 del (nt 1-9) (0.377)<br>4. pre-S1+pre-S2 del (0.000)                       | absence                                             |
| 51                 | 1. <b>wild-type (97.734)</b><br>2. pre-S1 del (1.546)<br>3. pre-S2 del (0.719)<br>4. pre-S1+pre-S2 del (0.000)         | 1. wild-type (97.734)<br>2. pre-S1 del (nt 3104-3202) (0.165)<br>3. pre-S2 del (nt 1-9) (0.377)<br>4. pre-S1+pre-S2 del (0.000)                       | absence                                             |
| 52                 | 1. <b>wild-type (98.167)</b><br>2. pre-S1 del (1.192)<br>3. pre-S2 del (0.617)<br>4. pre-S1+pre-S2 del (0.024)         | 1. wild-type (98.167)<br>2. pre-S1 del (nt 2854-3128) (0.132)<br>3. pre-S2 del (nt 1-9) (0.246)<br>4. pre-S1+pre-S2 del (nt 3022-3125, 1-55) (0.018)  | absence                                             |
| 53                 | 1. <b>wild-type (97.002)</b><br>2. pre-S1 del (2.144)<br>3. pre-S2 del (0.849)<br>4. pre-S1+pre-S2 del (0.005)         | 1. wild-type (97.002)<br>2. pre-S1 del (nt 3026-3205) (0.927)<br>3. pre-S2 del (nt 1-9) (0.528)<br>4. pre-S1+pre-S2 del (nt 3020-3119, 1-55) (0.005)  | absence                                             |
| 54                 | 1. <b>wild-type (96.687)</b><br>2. pre-S1 del (2.625)<br>3. pre-S2 del (0.676)<br>4. pre-S1+pre-S2 del (0.013)         | 1. wild-type (96.687)<br>2. pre-S1 del (nt 2855-2872) (1.117)<br>3. pre-S2 del (nt 1-12) (0.411)<br>4. pre-S1+pre-S2 del (nt 2855-2872, 1-17) (0.004) | absence                                             |

**Table S1. List of the NGS-based pre-S genotyping result in 75 HBV-related HCC patients (continued)**

| <b>Patient No.</b> | <b>Pre-S Del Type (%)<sup>a</sup></b>                                                                                                 | <b>Pre-S Del Region (%)<sup>c</sup></b>                                                                                                                  | <b>Del Spanning Pre-S2 Gene Segment<sup>d</sup></b> |
|--------------------|---------------------------------------------------------------------------------------------------------------------------------------|----------------------------------------------------------------------------------------------------------------------------------------------------------|-----------------------------------------------------|
| 55                 | 1. <b>wild-type (64.666)</b><br>2. <b>pre-S1 del (34.582)</b><br>3. pre-S2 del (0.493)<br>4. pre-S1+pre-S2 del (0.259)                | 1. wild-type (64.666)<br>2. pre-S1 del (nt 2858-2986) (33.466)<br>3. pre-S2 del (nt 1-9) (0.303)<br>4. pre-S1+pre-S2 del (nt 2858-2981, 1-10) (0.069)    | absence                                             |
| 56                 | 1. <b>pre-S1 del (69.372)</b><br>2. <b>wild-type (30.404)</b><br>3. pre-S2 del (0.218)<br>4. pre-S1+pre-S2 del (0.005)                | 1. pre-S1 del (nt 2856-3101) (66.854)<br>2. wild-type (30.404)<br>3. pre-S2 del (nt 1-12) (0.130)<br>4. pre-S1+pre-S2 del (nt 2984-3098, 1-10) (0.002)   | absence                                             |
| 57                 | 1. <b>wild-type (94.005)</b><br>2. pre-S1 del (3.729)<br>3. pre-S2 del (1.824)<br>4. pre-S1+pre-S2 del (0.442)                        | 1. wild-type (94.005)<br>2. pre-S1 del (nt 2895-3188) (0.677)<br>3. pre-S2 del (nt 1-54) (1.029)<br>4. pre-S1+pre-S2 del (nt 2855-2872, 1-54) (0.253)    | absence                                             |
| 58                 | 1. <b>wild-type (95.575)</b><br>2. pre-S1 del (2.481)<br>3. pre-S2 del (1.931)<br>4. pre-S1+pre-S2 del (0.013)                        | 1. wild-type (95.575)<br>2. pre-S1 del (nt 3039-3092) (0.590)<br>3. pre-S2 del (nt 1-12) (0.510)<br>4. pre-S1+pre-S2 del (nt 2854-2940, 1-144) (0.007)   | absence                                             |
| 59                 | 1. <b>pre-S2 del (64.182)</b><br>2. <b>wild-type (32.367)</b><br>3. pre-S1+pre-S2 del (2.975)<br>4. pre-S1 del (0.476)                | 1. pre-S2 del (nt 15-56) (33.613)<br>2. wild-type (32.367)<br>3. pre-S1+pre-S2 del (nt 3088-3126, 15-56) (0.176)<br>4. pre-S1 del (nt 2923-3090) (0.073) | presence                                            |
| 60                 | 1. <b>pre-S1 del (38.192)</b><br>2. <b>wild-type (34.644)</b><br>3. <b>pre-S2 del (19.195)</b><br>4. <b>pre-S1+pre-S2 del (7.968)</b> | 1. pre-S1 del (nt 2854-2970) (27.998)<br>2. wild-type (30.404)<br>3. pre-S2 del (nt 1-54) (18.373)<br>4. pre-S1+pre-S2 del (nt 3025-3126, 1-57) (2.383)  | presence                                            |

**Table S1. List of the NGS-based pre-S genotyping result in 75 HBV-related HCC patients (continued)**

| <b>Patient No.</b> | <b>Pre-S Del Type (%)<sup>a</sup></b>                                                                                                  | <b>Pre-S Del Region (%)<sup>c</sup></b>                                                                                                                           | <b>Del Spanning Pre-S2 Gene Segment<sup>d</sup></b> |
|--------------------|----------------------------------------------------------------------------------------------------------------------------------------|-------------------------------------------------------------------------------------------------------------------------------------------------------------------|-----------------------------------------------------|
| 61                 | 1. <b>pre-S1 del (40.086)</b><br>2. <b>wild-type (34.919)</b><br>3. <b>pre-S2 del (16.065)</b><br>4. <b>pre-S1+pre-S2 del (8.930)</b>  | 1. pre-S1 del (nt 2855-2965) (24.125)<br>2. wild-type (34.919)<br>3. pre-S2 del (nt 1-54) (15.565)<br>4. pre-S1+pre-S2 del (nt 3022-3126, 1-60) (2.911)           | presence                                            |
| 62                 | 1. <b>pre-S1 del (29.181)</b><br>2. <b>wild-type (23.836)</b><br>3. <b>pre-S2 del (23.645)</b><br>4. <b>pre-S1+pre-S2 del (23.338)</b> | 1. pre-S1 del (nt 2856-2969) (17.015)<br>2. wild-type (23.836)<br>3. pre-S2 del (nt 1-54) (23.402)<br>4. pre-S1+pre-S2 del (nt 2855-2872, 1-54) (15.956)          | presence                                            |
| 63                 | 1. <b>pre-S1 del (52.401)</b><br>2. <b>wild-type (42.979)</b><br>3. pre-S2 del (2.312)<br>4. pre-S1+pre-S2 del (2.308)                 | 1. pre-S1 del (nt 2854-2970) (43.037)<br>2. wild-type (42.979)<br>3. pre-S2 del (nt 1-54) (1.977)<br>4. pre-S1+pre-S2 del (nt 2860-2880, 2954-3097, 1-15) (1.445) | absence                                             |
| 64                 | 1. <b>pre-S1 del (41.155)</b><br>2. <b>wild-type (37.573)</b><br>3. <b>pre-S2 del (18.905)</b><br>4. pre-S1+pre-S2 del (2.367)         | 1. pre-S1 del (nt 2854-2970) (35.773)<br>2. wild-type (37.573)<br>3. pre-S2 del (nt 1-54) (18.494)<br>4. pre-S1+pre-S2 del (nt 2855-2970, 1-54) (1.676)           | presence                                            |
| 65                 | 1. <b>pre-S1 del (63.334)</b><br>2. <b>wild-type (32.806)</b><br>3. pre-S2 del (1.965)<br>4. pre-S1+pre-S2 del (1.895)                 | 1. pre-S1 del (nt 2854-2970) (33.450)<br>2. wild-type (32.806)<br>3. pre-S2 del (nt 1-54) (1.708)<br>4. pre-S1+pre-S2 del (nt 2855-2970, 1-54) (0.994)            | absence                                             |
| 66                 | 1. <b>wild-type (30.973)</b><br>2. <b>pre-S1+pre-S2 del (27.774)</b><br>3. <b>pre-S1 del (27.161)</b><br>4. <b>pre-S2 del (14.091)</b> | 1. wild-type (30.973)<br>2. pre-S1+pre-S2 del (nt 2855-2872, 1-54) (24.398)<br>3. pre-S1 del (nt 2854-2970) (14.813)<br>4. pre-S2 del (nt 1-54) (13.846)          | presence                                            |

**Table S1. List of the NGS-based pre-S genotyping result in 75 HBV-related HCC patients (continued)**

| <b>Patient No.</b> | <b>Pre-S Del Type (%)<sup>a</sup></b> | <b>Pre-S Del Region (%)<sup>c</sup></b>            | <b>Del Spanning Pre-S2 Gene Segment<sup>d</sup></b> |
|--------------------|---------------------------------------|----------------------------------------------------|-----------------------------------------------------|
| 67                 | 1. <b>wild-type (46.914)</b>          | 1. wild-type (46.914)                              | presence                                            |
|                    | 2. <b>pre-S1 del (45.517)</b>         | 2. pre-S1 del (nt 2854-2970) (37.666)              |                                                     |
|                    | 3. <b>pre-S2 del (6.834)</b>          | 3. pre-S2 del (nt 1-54) (5.216)                    |                                                     |
|                    | 4. pre-S1+pre-S2 del (0.735)          | 4. pre-S1+pre-S2 del (nt 2854-2970, 1-54) (0.307)  |                                                     |
| 68                 | 1. <b>pre-S1 del (43.130)</b>         | 1. pre-S1 del (nt 2854-2970) (35.888)              | presence                                            |
|                    | 2. <b>wild-type (41.965)</b>          | 2. wild-type (41.965)                              |                                                     |
|                    | 3. <b>pre-S2 del (9.508)</b>          | 3. pre-S2 del (nt 1-54) (9.239)                    |                                                     |
|                    | 4. <b>pre-S1+pre-S2 del (5.397)</b>   | 4. pre-S1+pre-S2 del (nt 2855-2872, 1-54) (4.160)  |                                                     |
| 69                 | 1. <b>wild-type (36.868)</b>          | 1. wild-type (36.868)                              | presence                                            |
|                    | 2. <b>pre-S1 del (35.238)</b>         | 2. pre-S1 del (nt 2854-2970) (29.499)              |                                                     |
|                    | 3. <b>pre-S2 del (21.130)</b>         | 3. pre-S2 del (nt 1-54) (20.218)                   |                                                     |
|                    | 4. <b>pre-S1+pre-S2 del (6.763)</b>   | 4. pre-S1+pre-S2 del (nt 2855-2872, 1-54) (3.332)  |                                                     |
| 70                 | 1. <b>wild-type (94.788)</b>          | 1. wild-type (94.788)                              | absence                                             |
|                    | 2. <b>pre-S1 del (4.643)</b>          | 2. pre-S1 del (nt 2854-3021) (3.404)               |                                                     |
|                    | 3. pre-S2 del (0.455)                 | 3. pre-S2 del (nt 1-15) (0.192)                    |                                                     |
|                    | 4. pre-S1+pre-S2 del (0.114)          | 4. pre-S1+pre-S2 del (nt 2855-2872, 1-54) (0.086)  |                                                     |
| 71                 | 1. <b>pre-S2 del (54.981)</b>         | 1. pre-S2 del (nt 48-56) (52.982)                  | presence                                            |
|                    | 2. <b>wild-type (42.238)</b>          | 2. wild-type (42.238)                              |                                                     |
|                    | 3. pre-S1+pre-S2 del (2.274)          | 3. pre-S1+pre-S2 del (nt 3026-3205, 48-56) (0.916) |                                                     |
|                    | 4. pre-S1 del (0.507)                 | 4. pre-S1 del (nt 2854-3021) (0.334)               |                                                     |
| 72                 | 1. <b>wild-type (91.511)</b>          | 1. wild-type (91.511)                              | absence                                             |
|                    | 2. <b>pre-S1 del (7.310)</b>          | 2. pre-S1 del (nt 2854-3021) (5.744)               |                                                     |
|                    | 3. pre-S2 del (0.807)                 | 3. pre-S2 del (nt 48-56) (0.294)                   |                                                     |
|                    | 4. pre-S1+pre-S2 del (0.373)          | 4. pre-S1+pre-S2 del (nt 2855-2872, 1-54) (0.322)  |                                                     |

**Table S1. List of the NGS-based pre-S genotyping result in 75 HBV-related HCC patients (continued)**

| Patient No. | Pre-S Del Type (%) <sup>a</sup>      | Pre-S Del Region (%) <sup>c</sup>                            | Del Spanning Pre-S2 Gene Segment <sup>d</sup> |
|-------------|--------------------------------------|--------------------------------------------------------------|-----------------------------------------------|
| 73          | 1. <b>wild-type (52.297)</b>         | 1. wild-type (52.297)                                        | presence                                      |
|             | 2. <b>pre-S1+pre-S2 del (31.339)</b> | 2. pre-S1+pre-S2 del (nt 2855-2872, 3012-3086, 1-51) (8.935) |                                               |
|             | 3. <b>pre-S1 del (12.863)</b>        | 3. pre-S1 del (nt 2855-2872, 3012-3092) (6.480)              |                                               |
|             | 4. pre-S2 del (3.502)                | 4. pre-S2 del (nt 1-51) (2.094)                              |                                               |
| 74          | 1. <b>wild-type (58.984)</b>         | 1. wild-type (58.984)                                        | presence                                      |
|             | 2. <b>pre-S2 del (34.533)</b>        | 2. pre-S2 del (nt 1-57) (20.926)                             |                                               |
|             | 3. pre-S1+pre-S2 del (4.497)         | 3. pre-S1+pre-S2 del (nt 3026-3205, 2-55) (0.590)            |                                               |
|             | 4. pre-S1 del (1.986)                | 4. pre-S1 del (nt 2944-3120) (1.128)                         |                                               |
| 75          | 1. <b>wild-type (97.112)</b>         | 1. wild-type (97.112)                                        | absence                                       |
|             | 2. pre-S1 del (2.178)                | 2. pre-S1 del (nt 2854-3021) (0.641)                         |                                               |
|             | 3. pre-S2 del (0.679)                | 3. pre-S2 del (nt 25-54) (0.355)                             |                                               |
|             | 4. pre-S1+pre-S2 del (0.031)         | 4. pre-S1+pre-S2 del (nt 2855-2970, 25-54) (0.007)           |                                               |

<sup>a</sup>The total percentage of pre-S gene DNA in each type of pre-S deletion was shown in descending order.

<sup>b</sup>The pre-S deletion type whose percentage was above the cut-off percentage (4.643) was shown in bold.

<sup>c</sup>The pre-S gene DNA with the highest frequency in each type of pre-S deletion was shown.

<sup>d</sup>The presence of deletion spanning pre-S2 gene segment was defined as the percentage of either pre-S2 or pre-S1+pre-S2 deletion above the cut-off percentage (4.643).

Abbreviations: NGS, next-generation sequencing; HBV, hepatitis B virus; HCC, hepatocellular carcinoma; del, deletion; nt, nucleotide.
